# Supplementary material
Source: PubMed Central journal article supplement (PMC7263391)
Supplement: rccm.201903-0623OC_danziger_data_supplement.pdf [file rccm.201903-0623OC_danziger_data_supplement.pdf]

Online Data Supplement

| Temporal trends of critical illness mortality rates according to hospital minority composition |         |         |         |         |         |
|------------------------------------------------------------------------------------------------|---------|---------|---------|---------|---------|
|                                                                                                | 2006-08 | 2009-10 | 2011-12 | 2013-14 | 2015-16 |
| All hospitals                                                                                  | 10.6    | 10.2    | 9.6     | 9.2     | 9.2     |
| Minority Serving hospitals                                                                     | 11.1    | 10.5    | 10.9    | 10.0    | 10.3    |
| African American                                                                               | 10.3    | 11.3    | 10.6    | 10.7    | 10.2    |
| Hispanic                                                                                       | 10.6    | 9.7     | 10.4    | 9.4     | 10.9    |
| White                                                                                          | 12.4    | 11.3    | 11.6    | 10.4    | 10.6    |
| Non-minority serving hospitals                                                                 | 10.5    | 10.2    | 9.4     | 9.2     | 9.1     |
| African American                                                                               | 10.1    | 10.1    | 8.8     | 8.3     | 8.4     |
| Hispanic                                                                                       | 7.3     | 8.1     | 7.0     | 7.6     | 8.0     |
| White                                                                                          | 10.7    | 10.3    | 9.5     | 9.3     | 9.3     |

Supplemental table I. Crude critical illness mortality rates (percentages) in minority and non-minority serving hospitals, stratified by ethnicity.
